# Supplementary material for: RelB contributes to the survival, migration and lymphomagenesis of B cells with constitutively active CD40 signaling
Source: Front Immunol. 2022 Aug 30;13:913275. doi: 10.3389/fimmu.2022.913275 (PMC9468873; doi:10.3389/fimmu.2022.913275)
Supplement: Supplementary file 3 [file Table_2.xlsx]

## Sheet: Sheet1
	Gene sets for TRAF2-KO and TRAF3-KO in B-lymphocytes
	underlying publication: Sandra Gardam, Frederic Sierro, Antony Basten, Fabienne Mackay, Robert Brink TRAF2 and TRAF3 signal adapters act cooperatively to control the maturation and survival signals delivered to B cells by the BAFF receptor Immunity 2008 Mar;28(3):391-401 DOI: 10.1016/j.immuni.2008.01.009
	NCBI-GEO series GSE10422 was used by the GEO2R application (https://www.ncbi.nlm.nih.gov/geo/geo2r/) to produce lists of differentially expressed genes. Following data sets (comprising of the given accession numbers) were compared: controls vs TRAF2-KO and controls vs TRAF3-KO
	controls: GSM263640, GSM263641, GSM263642, GSM263643, GSM263644, GSM263649, GSM263650, GSM263651
	TRAF2-KO: GSM263645, GSM263646
	TRAF3-KO: GSM263647, GSM263648
	For generation of the gene set lists all differentially expressed genes with an adjusted p-value below 0.05 were selected.
	TRAF2 KO upregulated	TRAF2 KO downregulated	TRAF3 KO upregulated	TRAF3 KO downregulated
	na	na	na	na
	Gpr34	Rhobtb2	Gpr34	Stk4
	Pygl	Pcdhb11	Rhbdf1	Mef2c
	Rhbdf1	Strbp	Il9r	Cbx4
	Il9r	Ppp2r5c	Pygl	Strbp
	Cnr1	Asna1	Ccr1	Timm8a1
	Thsd7a	Tgfbi	Ffar2	Gramd4
	Ptpn14	9230104K21Rik	Lilrb4a	Kdm3a
	Chka	Rps6	Chka	Tor1aip2
	Adm	4933427D14Rik	Cfp	Mapre1
	Lilrb4a	Gm7367	Chka	Yy1
	Vwf	Rhebl1	Ptpn14	Sept2
	Krt222	Abhd17b	Cacna1e	LOC102641500
	Adm	Zfp825	Adm	Rps6kb1
	Ccr1	Zfx	Ackr3	Nol8
	Chka	Zwilch	Nebl	Abhd17b
	Snrnp25	Gramd4	Serpina3g	Vps11
	Ppfibp2	Slc1a5	Ighg3	Sepp1
	St8sia6	Crybg3	Snrnp25	Ceacam2
	Rsu1	Hjurp	Ffar2	Cmss1
	Gcm2	Zeb2	Adm	Chic2
	Epcam	Zfp821	Rsu1	Plaur
	Nebl	Agpat5	Epcam	B4galt1
	Cfp	Foxp1	Tk1	Cpt1a
	St8sia6	Dhrs11	Ppfibp2	Gm11346
	Chst10	Slx1b	Mpeg1	Sept11
	Lrrc16a	Msl1	Trps1	Cytip
	Anxa4	Fcgr2b	Krt222	Phxr1
	Akap5	Ankrd11	Anxa4	Arl5b
	Ahcyl2	Sepp1	Nebl	Sdc1
	Ffar2	Hmgn5	Pde8a	Smpd4
	Cd9	Prpf31	Cd9	Fam65b
	Ksr1	Timm8a1	Thsd7a	Dync1li2
	Cdon	LOC102638110	Chst10	Socs3
	Marcks	9430034N14Rik	Lrrc16a	Hdac9
	Itgb3	Sec61a1	Plbd1	Coro1a
	Reep3	Smim3	Cnr1	Wfdc18
	Specc1	Smc4	Gpm6a	Arih1
	Reep3	Slc16a1	Pbx3	Knop1
	Nid1	Aurkc	Itgb3	Cpsf2
	Ebi3	Rbm25	Mpg	Cited2
	St8sia6	Cox5b	Cd59a	Hmgn5
	Nebl	Piga	Traf1	Saraf
	Kynu	Strbp	AI447881	Egr1
	Cd59a	Ager	Ubash3b	Gpr155
	Krt222	Phxr1	Cdon	Fyn
	Glt28d2	Alcam	Trps1	Cmah
	Ptpn22	Cpt1a	Ighg3	Slamf1
	Pbx3	Apaf1	St8sia6	Papola
	Whrn	Tnfrsf13c	Ptpn22	Crybg3
	Ndrg1	Saraf	Marcks	Klf3
	Plbd1	Mgst1	Ebi3	Vsir
	Tshz1	Cdkn2c	Ahcyl2	Vcpkmt
	Pde8a	Cpt1a	Smpd5	Lrrc8a
	Pard3b	Rnpc3	Tshz1	Tmem176b
	Tk1	Txnrd3	Cbarp	Ube2h
	Atxn1	Rapgef4	Pard3b	Dennd5b
	Sbf2	Man2a2	Cyfip1	Agpat9
	Ptk2	AU014973	Morn1	Alcam
	Ift140	Arhgef18	Reep3	Ppp1r8
	Traf1	Alcam	Krt222	Slco4a1
	LOC102635638	Sdc1	Mpg	5830415B17Rik
	Trps1	Serinc1	St8sia6	Tbl1x
	Nedd4	Plcxd2	LOC102635638	Akap12
	Abcc1	Ankrd33b	Abcc1	Cd93
	AI447881	B3gnt5	Daam1	Spns2
	Cyfip1	Alcam	Myl4	Hist1h1c
	Cbarp	Gng12	Naip2	Ppm1e
	Trps1	Snord47	Trps1	Slc2a4rg-ps
	Reep3	Srsf7	Ptpn14	Myadm
	Marcks	Tfrc	Cd300lf	Il18
	Inf2	Slc25a51	Tbc1d9	Gpr146
	A630023P12Rik	Slamf1	Coprs	Fam101b
	Rasgef1b	Cd93	Fam92a	Slc15a3
	Reep3	Hist1h1c	Oosp1	D8Ertd82e
	Plcg1	Gm11346	Pglyrp1	Pde2a
	Bcl2	Eps8	Reep3	Hist1h1c
	Coprs	Ehd4	Pou2af1	Cd93
	Dnase1l3	Ostc	Ift140	Fam129c
	Brms1l	Sys1	Ubash3b	Myadm
	Wnt10a	Evi5	Ehd1	Hivep3
	Ifit1bl2	Trib2	St14	Smad1
	Pard3b	Snx5	Atxn1	Sgk1
	Id2	Coro1a	Kynu	Rapgef3
	Abcb9	Ahctf1	Ksr1	Tsc22d1
	Gabbr1	Serpinb1a	Lta	Lifr
	Myl4	Slamf9	Rras2	Ptger4
	Morn1	Fam101b	1500011K16Rik	Eya1
	Kif1b	Btf3	Vwf	Maf
	Traf1	Cmah	Rasgef1b	Cxcr4
	Naip2	Tmem176b	Pik3r4	Kctd14
	Atxn1	Gm7429	Klhl7	Sdc1
	Mpg	Vps18	Ttc8	Kctd14
	Ighg3	Fam129c	Fam213a	Sox4
	Kcnk5	Hist1h1c	Ptk2
	Pou2af1	Sgk1	Marcks
	Ehd1	Snhg1	Sbf2
	Mpg	Epc1	Nr2f6
	Dkkl1	Pabpc1	Lgalsl
	Ackr3	Ezh2	Traf1
	Fam213a	D8Ertd82e	Tmem18
	Prmt2	Ubl5	Fam160a1
	Mpg	Smad1	Gramd3
	Fhit	Myadm	Zadh2
	Asb2	Pltp	A630023P12Rik
	Stx11	Myadm	Wnt10a
	Prmt2	Akap12	Faah
	Ahcyl2	Il5ra	Rgmb
	St14	Gpr146	Reep3
	Ttc28	Jun	Trim7
	Anxa4	Eya1	Optn
	Ffar2	Ms4a4b	Cyp39a1
	Capn2	Egr1	Dusp16
	Fam160a1	Csrp2	Pard3b
	Rinl	Il18	Serinc4///Ell3
	Lta	Spns2	Kdelc1
	Nfat5	Cd93	Reep3
	Daam1	Slc15a3	St3gal2
	Ttc8	Maf	Plcg1
	Ptpn14	Rapgef3	Hdac11
	Tbc1d9	Slco4a1	Myo1b
	Fam167a	Gpr155	Inadl
	Faah	Car2	Rras2
	1500011K16Rik	Pltp	Trim7
	D3Ertd254e	Kctd14	Capn2
	Phlpp1	Socs3	Whrn
	Rras2	Socs3	Lgalsl
	Lgalsl	Wfdc17	Ttc28
	Inadl	Ptger4	Ccr1
	Ehd1	Hivep3	Slc25a4
	Nfatc2	Kctd14	St8sia6
	Arhgap5	Tsc22d1	Nedd4
	Arhgap5	Lifr	Abhd14b
	Lynx1	Tsc22d1	Glt28d2
	Kdelc1	Sdc1	Lmntd2
	Hspb1	Klf4	Cdh17
	Hs3st3b1	Sox4	Pld2
	Zadh2	Fos	Tgif2
	Oosp1		Hcst
	Ehd3		LOC102642406
	Pik3r4		Golim4
	Gm16619		St6galnac3
	Klhl7		Tpk1
	Dusp16		Specc1
	Pdia4		Pde3b
	Stxbp1		Arrb2
	Zfp287		Aire
	Ehd1		Cdc42bpb
	Map3k5		Meis3
	Serinc4		Fdx1
	Pld2		Nfatc2
	Tmbim1		Pmepa1
	Ttc28		Slc29a3
	Smad3		Prmt2
	Hcst		Zscan12
	Bcl2		Odc1
	Akap5		P4htm
	Ctnna1		Ccdc163
	Mast4		2210013O21Rik
	Cdc42bpb		2210016L21Rik
	Smim10l1		Kif3a
	Smim10l1		Grpel2
	P4htm		Slc12a2
	Tbc1d5		Chid1
	Tcf4		Stxbp1
	Rnf24		Eva1b
	Abcb1a		Pqlc1
	Prkar2a		Ldlrad3
	Slc29a3		Hck
	Mst1		Zbtb42
	Dclre1a		Kif3a
	Tgif2		Pim2
	Tank		Nubpl
	St3gal2		Tbxa2r
	Nfat5		Prlr
	Trim7		Zfp763
	Degs1		Afg3l2
	Fpgt		Naprt
	Lpcat1		Tes
	Fam57a		Tmbim1
	Pea15a		Map3k5
	Cyp4v3		Nr2c1
	Anxa4		Acsl3
	Notch1		Rps6
	Serpinb9		Anxa4
	Chd3os		Cdca7l
	Rubcn		Htra2
	Eva1b		Cenpp
	Abhd14b		Spib
	Cyp39a1		Snrnp70
	Man2a1		Dnajc16
	Reep3		Tpi1
	Zfp563		Prkar1b
	Snap47		Phlpp1
	Fdx1		Pea15a
	Senp8		Hpcal1
	Mgat4a		Sfmbt1
	Cr2		Nfkb2
	Rasgrp3		Ptpn18
	Grpel2		Rpl13a
	Cand1		Pawr
	Slc39a14		Ttll12
	Grpel2		Cds2
	Mllt4		Dcbld1
	Osmr		Ankrd36
	Cdh17		Gpi1
	Tes		Chd3os
	Slc25a4		H1f0
	Rgmb		5430416N02Rik
	Ints2		Itgam
	Spata6
	Zmiz2
	Tpi1
	4833444G19Rik
	Lipo3
	Lcp1
	Tspyl3
	2210013O21Rik
	Manea
	Larp4
	Cds2
	Gramd1b
	Specc1l
	BC017158
	Kdm2a
	Tpk1
	Tbxa2r
	Cdk5rap2
	Gramd3
	Nmrk1
	Pqlc1
	Aldoa
	Col20a1
	Gm33374
	Tm7sf3
	Zfp937
	4930588G05Rik
	Adam22
